# Supplementary material
Source: PubMed Central journal article supplement (PMC6760309)
Supplement: NIHMS1535314-supplement-Supplemental_Material.pdf [file NIHMS1535314-supplement-Supplemental_Material.pdf]

# SUPPLEMENTAL MATERIAL

Supplemental Table I: Prenotification among EMS recognized posterior strokes before and after training.

|               | Before<br>N (%) | After<br>N (%) | p-value |
|---------------|-----------------|----------------|---------|
| FTN group     | 4/11 (36)       | 8/20 (40)      | 0.842   |
| Control group | 14/16 (88)      | 13/15 (87)     | 0.945   |

Supplemental Table II: Stroke overcall rates before and after training for the FTN and control agencies among all EMS suspected strokes.

|               | Before<br>N (%) | After<br>N (%) | p-value |
|---------------|-----------------|----------------|---------|
| FTN group     | 142/348 (41)    | 83/214 (39)    | 0.635   |
| Control group | 187/433 (43)    | 128/331 (39)   | 0.209   |
